# Supplementary material for: Comparative Microbial Profiles of Colonic Digesta between Ningxiang Pig and Large White Pig
Source: MDPI journal article supplement (doi:10.3390/ani11071862), 2021-06-23

## Supplementary Information

**Supplementary Table S1. Raw reads and selected effective sequences in each group.**

| Sample_name | Raw_reads(#) | Clean_Reads(#) | Base(nt) | AvgLen(nt) | Q20   | GC%   | Effective% |
|-------------|--------------|----------------|----------|------------|-------|-------|------------|
| NX.1        | 65110        | 63875          | 26489375 | 414        | 80.83 | 52.69 | 98.1       |
| NX.2        | 79336        | 74044          | 30886602 | 417        | 78.76 | 52.55 | 93.33      |
| NX.3        | 63944        | 62607          | 25859956 | 413        | 79.95 | 52.53 | 97.91      |
| NX.4        | 67123        | 61183          | 25221110 | 412        | 78.91 | 52.72 | 91.15      |
| NX.5        | 84177        | 80265          | 33084136 | 412        | 79.25 | 52.78 | 95.35      |
| NX.6        | 80016        | 76521          | 31639436 | 413        | 80.3  | 53.09 | 95.63      |
| NX.7        | 68087        | 65771          | 27126396 | 412        | 80.32 | 52.84 | 96.6       |
| NX.8        | 69678        | 63305          | 26227411 | 414        | 78.88 | 52.85 | 90.85      |
| LW.1        | 75822        | 70272          | 29012688 | 412        | 80.18 | 52.94 | 92.68      |
| LW.2        | 71438        | 70402          | 29020908 | 412        | 80.24 | 52.8  | 98.55      |
| LW.3        | 92180        | 91066          | 37686652 | 413        | 83.77 | 53    | 98.79      |
| LW.4        | 88905        | 84840          | 35271451 | 415        | 79.69 | 52.78 | 95.43      |
| LW.5        | 70237        | 67238          | 28045529 | 417        | 78.81 | 52.62 | 95.73      |
| LW.6        | 63747        | 60287          | 25142490 | 417        | 79.94 | 52.38 | 94.57      |
| LW.7        | 69065        | 65522          | 27220430 | 415        | 80.45 | 52.79 | 94.87      |
| LW.8        | 70412        | 67832          | 28049244 | 413        | 80.21 | 52.95 | 96.34      |

**Table S2. Number of observed species, richness and diversity indices in the caecal samples from each dietary treatment.**

| Sample name | Observed_species | Shannon | Simpson | Chao1   | ACE     | Goods_coverage | PD_whole_tree |
|-------------|------------------|---------|---------|---------|---------|----------------|---------------|
| NX.1        | 718              | 7.026   | 0.981   | 753.253 | 758.244 | 0.998          | 51.48         |
| NX.2        | 733              | 6.929   | 0.979   | 814.014 | 798.472 | 0.997          | 59.856        |
| NX.3        | 541              | 6.356   | 0.973   | 605.556 | 593.965 | 0.998          | 43.375        |
| NX.4        | 665              | 6.366   | 0.955   | 680.374 | 697.004 | 0.998          | 49.706        |
| NX.5        | 696              | 6.603   | 0.965   | 820.744 | 802.956 | 0.996          | 49.315        |
| NX.6        | 704              | 5.949   | 0.94    | 799.25  | 793.901 | 0.997          | 51.853        |
| NX.7        | 714              | 6.441   | 0.957   | 768.529 | 782.097 | 0.997          | 52.644        |
| NX.8        | 563              | 6.483   | 0.974   | 610.443 | 612.971 | 0.998          | 43.878        |
| LW.1        | 634              | 6.306   | 0.954   | 682.95  | 689.891 | 0.998          | 47.926        |
| LW.2        | 759              | 6.443   | 0.95    | 820.933 | 834.598 | 0.997          | 54.632        |
| LW.3        | 695              | 6.379   | 0.955   | 766.959 | 759.72  | 0.997          | 49.88         |
| LW.4        | 762              | 7.1     | 0.979   | 860.413 | 849.348 | 0.997          | 54.19         |
| LW.5        | 719              | 6.912   | 0.978   | 788.709 | 790.814 | 0.997          | 52.9          |
| LW.6        | 701              | 6.096   | 0.933   | 763.817 | 762.174 | 0.997          | 51.754        |
| LW.7        | 690              | 6.757   | 0.971   | 733.076 | 738.697 | 0.998          | 51.244        |
| LW.8        | 640              | 6.097   | 0.941   | 666.636 | 685.004 | 0.998          | 47.255        |

**Figure S1** The top 35 genera were identified across all samples between two pig breeds

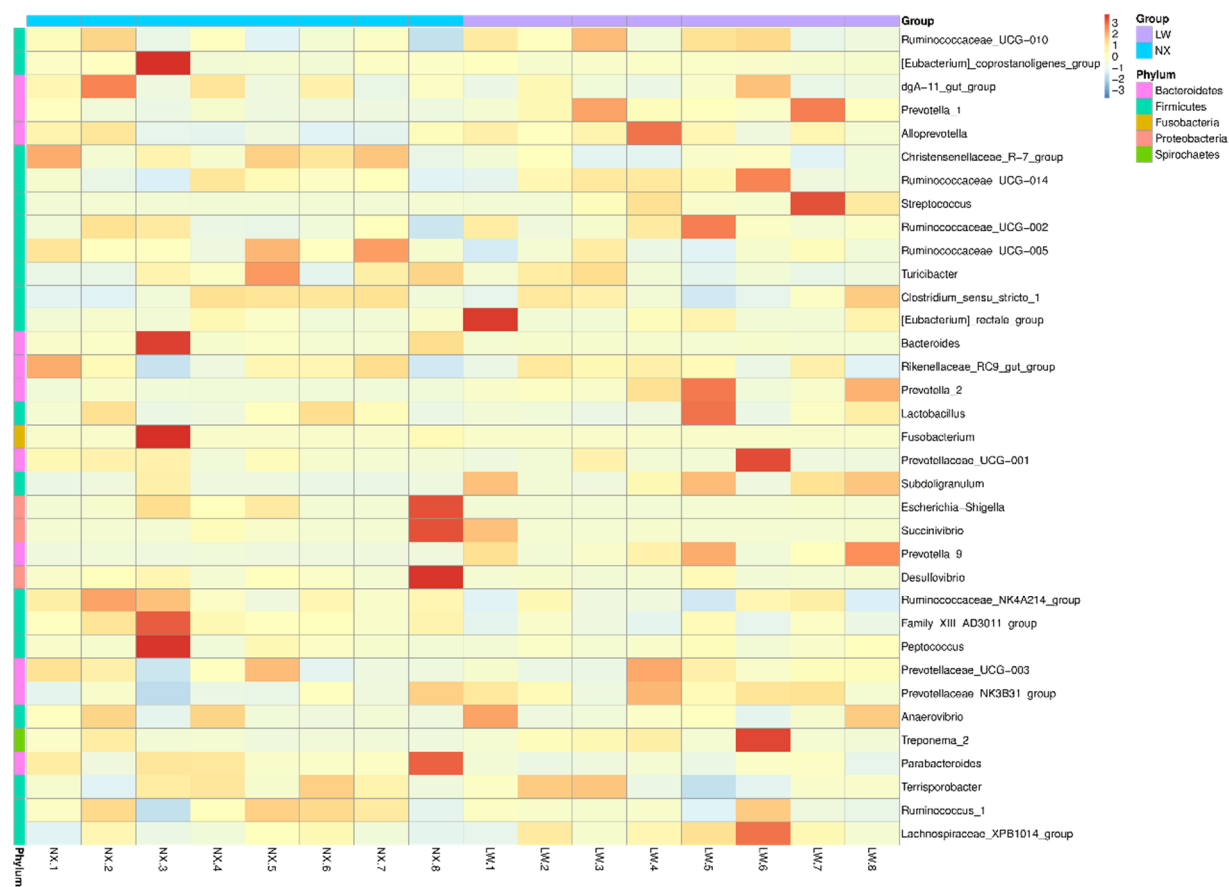

Supplement: s1 [file s1]
